# Supplementary material
Source: publisher figshare collection journal article supplement (https://gsapubs.figshare.com/ndownloader/files/23318021)
Supplement: Supplementary file 1 [file 23318021]

## Sheet: data
File	Comment	δ18O corrected (VSMOW)	2SD (external precision)	Mass Bias (‰)	δ18O measured	2SE (internal precision)	16O (Gcps)	IP (nA)	Yield (Gcps/nA)	Date	Time	X	Y	DTFA-X	DTFA-Y	16OH/16O	Background Corrected 16OH/16O	Chamber Pressure	Include in final analysis?	Reason for removal from final analysis?*	Phase Type**	FIA Assemblage Temp. (minimum)	FIA Assemblage Temp. (maximum)
	UWQ-1	12.33																		*Analyses marked here as excluded due to aberrant OH behaviour exhibit Group 1 behavior (Appendix C)	**Petrographic phase of quartz; D = Detrital grains, A = Authigenic (quartz overgrowths), B1 = Fracture-parallel quartz bridge growth (first part of bridges to form), B2 = Fracture-perpendicular quartz bridge growth (quartz growth around original bridge, into empty fracture space)
	Included in Denny et al., 2019: A History of Pore Water Oxygen Isotope Evolution in the Cretaceous Travis Peak Formation.
	Sample: Quartz Bridge (User: A. Denny)
20170918@562.asc	UWQ1 G1				4.421	0.234	2.73482	1.60546	1.70345	2017-09-21	20:48:00	1022	550	-38	36	0.000121217		2.3e-08	Y
20170918@563.asc	UWQ1 G1				4.221	0.291	2.76164	1.60813	1.7173	2017-09-21	20:53:00	1022	570	-39	36	0.000135288		2.4e-08	Y
20170918@564.asc	UWQ1 G1				4.556	0.159	2.7544	1.60931	1.71154	2017-09-21	20:56:00	1042	570	-40	36	0.000134399		2.5e-08	Y
20170918@565.asc	UWQ1 G1				4.093	0.203	2.77364	1.61029	1.72245	2017-09-21	20:59:00	1042	590	-39	36	0.000143353		2.5e-08	Y
	average and 2SD	12.33		-7.90972	4.32275	0.41182										0.000133564
20170918@566.asc	02_SFE2_9840_2_B3_001	14.9405	0.372804		6.812	0.27	2.70442	1.59923	1.69108	2017-09-21	21:07:00	-2183	253	-30	27	0.000195878	5.33306e-05	2.5e-08	Y		D
20170918@567.asc	02_SFE2_9840_2_B3_002	24.0676	0.372804		15.866	0.224	2.67046	1.5938	1.67554	2017-09-21	21:12:00	-2185	213	-29	27	0.000130616	-1.1931e-05	2.6e-08	Y		A
20170918@568.asc	02_SFE2_9840_2_B3_003	23.5495	0.372804		15.352	0.249	2.56032	1.58873	1.61155	2017-09-21	21:15:00	-2185	203	-29	26	0.000138572	-3.97498e-06	2.6e-08	Y		A
20170918@569.asc	02_SFE2_9840_2_B3_004	23.8912	0.372804		15.691	0.283	2.59381	1.58952	1.63182	2017-09-21	21:19:00	-2185	193	-29	25	0.000132128	-1.04196e-05	2.6e-08	Y		A
20170918@570.asc	02_SFE2_9840_2_B3_005	13.8075	0.372804		5.688	0.286	2.65773	1.58448	1.67735	2017-09-21	21:22:00	-2267	199	-28	26	0.000164692	2.21444e-05	2.6e-08	Y		D
20170918@571.asc	02_SFE2_9840_2_B3_006	21.0787	0.372804		12.901	0.488	2.61421	1.58357	1.65084	2017-09-21	21:26:00	-2229	175	-27	25	0.00029293	0.000150382	2.6e-08	Y		A
20170918@572.asc	02_SFE2_9840_2_B3_007	20.3872	0.372804		12.215	0.281	2.59249	1.58067	1.64013	2017-09-21	21:30:00	-2215	175	-27	25	0.000245814	0.000103266	2.6e-08	Y		A
20170918@573.asc	02_SFE2_9840_2_B3_008	25.3287	0.372804		17.117	0.246	2.53944	1.58018	1.60705	2017-09-21	21:33:00	-2195	177	-28	24	0.000151032	8.48472e-06	2.6e-08	Y		A
20170918@574.asc	02_SFE2_9840_2_B3_009	12.2964	0.372804		4.189	0.261	2.61296	1.56863	1.66576	2017-09-21	21:39:00	-2397	179	-26	25	0.000129228	-1.33197e-05	2.6e-08	Y		D
20170918@575.asc	02_SFE2_9840_2_B3_010	12.4143	0.372804		4.306	0.314	2.61028	1.56413	1.66884	2017-09-21	21:43:00	-2413	179	-25	25	0.000182104	3.95564e-05	2.6e-08	Y		D
20170918@576.asc	02_SFE2_9840_2_B3_011	25.3519	0.372804		17.14	0.243	2.64021	1.56329	1.68888	2017-09-21	21:46:00	-2383	181	-26	25	0.000146202	3.65432e-06	2.6e-08	Y		A
20170918@577.asc	02_SFE2_9840_2_B3_012	23.5152	0.372804		15.318	0.264	2.64737	1.56561	1.69095	2017-09-21	21:49:00	-2373	189	-27	25	0.000145559	3.01142e-06	2.6e-08	Y		A
20170918@578.asc	02_SFE2_9840_2_B3_013	23.117	0.372804		14.923	0.254	2.67587	1.56387	1.71106	2017-09-21	21:53:00	-2365	197	-27	25	0.00014072	-1.82738e-06	2.6e-08	Y		A
20170918@579.asc	02_SFE2_9840_2_B3_014	23.5717	0.372804		15.374	0.225	2.77328	1.56293	1.77441	2017-09-21	21:56:00	-2363	205	-28	26	0.000136497	-6.05048e-06	2.7e-08	Y		A
20170918@580.asc	02_SFE2_9840_2_B3_015	23.7481	0.372804		15.549	0.27	2.58713	1.55865	1.65985	2017-09-21	22:00:00	-2357	171	-27	25	0.000181334	3.87864e-05	2.6e-08	Y		A
20170918@581.asc	02_SFE2_9840_2_B3_016	19.6271	0.372804		11.461	0.37	2.52095	1.55731	1.61878	2017-09-21	22:04:00	-2380	95	-23	25	0.000144369	1.82132e-06	2.6e-08	N	Mixed phases	M
20170918@582.asc	02_SFE2_9840_2_B3_017	24.8096	0.372804		16.602	0.33	2.48415	1.55989	1.59252	2017-09-21	22:07:00	-2376	85	-24	24	0.000142214	-3.33575e-07	2.6e-08	Y		A
20170918@583.asc	UWQ1 G1				4.247	0.273	2.7	1.57371	1.71569	2017-09-21	22:11:00	1051	601	-41	37	0.000150002		2.6e-08	Y
20170918@584.asc	UWQ1 G1				4.123	0.21	2.69228	1.57285	1.71172	2017-09-21	22:15:00	1071	601	-41	36	0.000147434		2.7e-08	Y
20170918@585.asc	UWQ1 G1				3.982	0.281	2.71011	1.56966	1.72656	2017-09-21	22:18:00	1051	621	-41	37	0.000160562		2.6e-08	Y
20170918@586.asc	UWQ1 G1				4.136	0.296	2.71504	1.57181	1.72733	2017-09-21	22:21:00	1071	621	-42	36	0.000148123		2.7e-08	Y
	average and 2SD	12.33		-8.10803	4.122	0.217323										0.00015153
	bracket average and 2SD	12.33		-8.00888	4.22238	0.372804										0.000142547
20170918@587.asc	02_SFE2_9840_2_B3_018	22.7099	0.241897		14.493	0.251	2.71642	1.56684	1.73369	2017-09-21	22:27:00	-2007	-479	-26	32	0.000128034	-2.85333e-05	2.6e-08	Y		A
20170918@588.asc	02_SFE2_9840_2_B3_019	23.3672	0.241897		15.145	0.311	2.66409	1.56508	1.70221	2017-09-21	22:31:00	-1997	-489	-26	31	0.00013977	-1.67975e-05	2.7e-08	Y		A
20170918@589.asc	02_SFE2_9840_2_B3_020	12.519	0.241897		4.384	0.33	2.70728	1.55993	1.73552	2017-09-21	22:34:00	-1995	-501	-26	31	0.000154142	-2.4251e-06	2.7e-08	N	Mixed phases	M
20170918@590.asc	02_SFE2_9840_2_B3_021	12.0029	0.241897		3.872	0.288	2.65478	1.56356	1.69791	2017-09-21	22:38:00	-1985	-507	-27	31	0.000150453	-6.1146e-06	2.7e-08	Y		D
20170918@591.asc	02_SFE2_9840_2_B3_022	24.1847	0.241897		15.956	0.374	2.69767	1.56131	1.72783	2017-09-21	22:42:00	-1935	-493	-26	32	0.000565027	0.00040846	2.6e-08	N	aberrant OH behavior	A
20170918@592.asc	02_SFE2_9840_2_B3_023	24.9146	0.241897		16.68	0.275	2.70059	1.56272	1.72814	2017-09-21	22:45:00	-1933	-483	-26	32	0.000148397	-8.1704e-06	2.6e-08	Y		A
20170918@593.asc	02_SFE2_9840_2_B3_024	25.1263	0.241897		16.89	0.269	2.71166	1.56162	1.73644	2017-09-21	22:48:00	-1929	-473	-26	32	0.000148263	-8.3043e-06	2.6e-08	Y		A
20170918@594.asc	02_SFE2_9840_2_B3_025	25.589	0.241897		17.349	0.247	2.72047	1.56001	1.74387	2017-09-21	22:51:00	-1929	-463	-27	32	0.000148571	-7.9962e-06	2.7e-08	Y		A
20170918@595.asc	02_SFE2_9840_2_B3_026	22.9216	0.241897		14.703	0.191	2.73396	1.5539	1.75942	2017-09-21	22:55:00	-1930	-450	-26	32	0.000253783	9.72162e-05	2.7e-08	N	aberrant OH behavior	A
20170918@596.asc	02_SFE2_9840_2_B3_027	14.4263	0.241897		6.276	0.258	2.68126	1.54152	1.73936	2017-09-21	22:59:00	-2051	-318	-26	33	0.000140519	-1.60478e-05	2.7e-08	Y		D
20170918@597.asc	02_SFE2_9840_2_B3_028	15.3215	0.241897		7.164	0.162	2.63236	1.5442	1.70467	2017-09-21	23:03:00	-2096	-314	-25	33	0.000140818	-1.57494e-05	2.7e-08	Y		D
20170918@598.asc	02_SFE2_9840_2_B3_029	24.1716	0.241897		15.943	0.296	2.62799	1.54253	1.70369	2017-09-21	23:07:00	-2116	-275	-25	32	0.000213761	5.71936e-05	2.7e-08	Y		B1
20170918@599.asc	02_SFE2_9840_2_B3_030	23.0799	0.241897		14.86	0.292	2.6976	1.54048	1.75113	2017-09-21	23:11:00	-2109	-259	-25	32	0.000383821	0.000227254	2.7e-08	Y		B1	127.2	132.1
20170918@600.asc	02_SFE2_9840_2_B3_031	23.9247	0.241897		15.698	0.253	2.6496	1.53894	1.7217	2017-09-21	23:14:00	-2109	-249	-25	31	0.000158535	1.9673e-06	2.7e-08	Y		B1	127.8	130.2
20170918@601.asc	02_SFE2_9840_2_B3_032	24.088	0.241897		15.86	0.233	2.60141	1.53604	1.69358	2017-09-21	23:19:00	-2147	-257	-24	29	0.000216223	5.9656e-05	2.7e-08	Y		B1
20170918@602.asc	02_SFE2_9840_2_B3_033	22.5849	0.241897		14.369	0.263	2.78571	1.53454	1.81533	2017-09-21	23:22:00	-2077	-253	-26	32	0.000218184	6.16173e-05	2.7e-08	Y		B1
20170918@603.asc	02_SFE2_9840_2_B3_034	22.847	0.241897		14.629	0.244	2.71993	1.53279	1.7745	2017-09-21	23:26:00	-2035	-249	-27	33	0.000150696	-5.8714e-06	2.6e-08	Y		B2
20170918@604.asc	02_SFE2_9840_2_B3_035	23.6484	0.241897		15.424	0.249	2.69126	1.53138	1.75741	2017-09-21	23:30:00	-2047	-249	-26	33	0.000172395	1.58279e-05	2.7e-08	Y		B2
20170918@605.asc	02_SFE2_9840_2_B3_036	22.4347	0.241897		14.22	0.165	2.65408	1.52763	1.73739	2017-09-21	23:33:00	-2120	-223	-24	32	0.000175852	1.92852e-05	2.7e-08	Y		B1	130.5	132
20170918@606.asc	02_SFE2_9840_2_B3_037	23.848	0.241897		15.622	0.405	2.62015	1.52575	1.71729	2017-09-21	23:37:00	-2120	-211	-25	31	0.00064366	0.000487093	2.7e-08	Y		B1	130.8	132.7
20170918@607.asc	UWQ1 G1				4.257	0.243	2.64148	1.53383	1.72215	2017-09-21	23:41:00	1067	641	-39	38	0.000174019		2.7e-08	Y
20170918@608.asc	UWQ1 G1				4.369	0.261	2.65068	1.53317	1.72889	2017-09-21	23:44:00	1087	641	-40	38	0.000151884		2.7e-08	Y
20170918@609.asc	UWQ1 G1				4.161	0.263	2.63549	1.53253	1.7197	2017-09-21	23:47:00	1107	641	-40	38	0.000149875		2.7e-08	Y
20170918@610.asc	UWQ1 G1				4.297	0.271	2.52968	1.52903	1.65443	2017-09-21	23:50:00	1087	621	-40	37	0.000170639		2.7e-08	Y
	average and 2SD	12.33		-7.96084	4.271	0.173497										0.000161604
	bracket average and 2SD	12.33		-8.03444	4.1965	0.241897										0.000156567
20170918@611.asc	02_SFE2_9840_2_B3_038	17.8907	0.391574		9.615	1.229	2.45133	1.52065	1.61204	2017-09-21	23:55:00	-2026	-297	-25	33	0.00461774	0.00445611	2.7e-08	N	aberrant OH behavior	M
20170918@612.asc	02_SFE2_9840_2_B3_039	23.5326	0.391574		15.211	0.242	2.68494	1.51573	1.77138	2017-09-21	23:59:00	-2030	-285	-25	34	0.000152289	-9.34183e-06	2.7e-08	Y		B1
20170918@613.asc	02_SFE2_9840_2_B3_040	23.6032	0.391574		15.281	0.32	2.62297	1.51357	1.73297	2017-09-22	00:03:00	-2129	-207	-24	31	0.000271882	0.000110251	2.7e-08	Y		B1	133.2	133.2
20170918@614.asc	02_SFE2_9840_2_B3_041	24.9451	0.391574		16.612	0.257	2.59362	1.51101	1.71648	2017-09-22	00:06:00	-2133	-187	-24	31	0.0001708	9.16887e-06	2.7e-08	Y		B1
20170918@615.asc	02_SFE2_9840_2_B3_042	23.9228	0.391574		15.598	0.19	2.68165	1.51356	1.77176	2017-09-22	00:11:00	-2032	-159	-25	32	0.000162213	5.82375e-07	2.6e-08	Y		B1
20170918@616.asc	02_SFE2_9840_2_B3_043	24.1183	0.391574		15.792	0.248	2.65803	1.5097	1.76063	2017-09-22	00:15:00	-2044	-157	-25	32	0.000179157	1.75262e-05	2.7e-08	Y		B1
20170918@617.asc	02_SFE2_9840_2_B3_044	15.1162	0.391574		6.863	0.288	2.61078	1.50224	1.73793	2017-09-22	00:19:00	-2118	-154	-24	31	0.000147521	-1.411e-05	2.7e-08	Y		D
20170918@618.asc	02_SFE2_9840_2_B3_045	22.8268	0.391574		14.511	0.309	2.63563	1.50371	1.75275	2017-09-22	00:22:00	-2073	-142	-24	32	0.000230919	6.92879e-05	2.7e-08	Y		B1
20170918@619.asc	02_SFE2_9840_2_B3_046	23.1343	0.391574		14.816	0.282	2.60982	1.50475	1.73439	2017-09-22	00:26:00	-2079	-124	-25	32	0.000178317	1.66864e-05	2.7e-08	Y		B1	135	141
20170918@620.asc	02_SFE2_9840_2_B3_047	23.1817	0.391574		14.863	0.207	2.61173	1.50087	1.74014	2017-09-22	00:29:00	-2083	-109	-24	31	0.000188675	2.70441e-05	2.7e-08	Y		B1	134.9	136.5
20170918@621.asc	02_SFE2_9840_2_B3_048	22.6968	0.391574		14.382	0.235	2.63688	1.50138	1.75631	2017-09-22	00:32:00	-2087	-96	-25	31	0.000464817	0.000303186	2.7e-08	Y		B1	134.6	137.5
20170918@622.asc	02_SFE2_9840_2_B3_049	22.1927	0.391574		13.882	0.724	2.59685	1.49523	1.73676	2017-09-22	00:35:00	-2093	-89	-24	30	0.000259967	9.83357e-05	2.6e-08	Y		B1
20170918@623.asc	02_SFE2_9840_2_B3_050	14.8631	0.391574		6.612	0.36	2.60678	1.49473	1.74398	2017-09-22	00:39:00	-2092	-73	-24	30	0.000159722	-1.90943e-06	2.7e-08	Y		D
20170918@624.asc	02_SFE2_9840_2_B3_051	23.1313	0.391574		14.813	0.22	2.63021	1.49362	1.76097	2017-09-22	00:42:00	-2072	-57	-25	30	0.000162149	5.17875e-07	2.7e-08	Y		B1
20170918@625.asc	02_SFE2_9840_2_B3_052	24.4742	0.391574		16.145	0.276	2.58928	1.49525	1.73167	2017-09-22	00:46:00	-2089	-44	-25	29	0.000180162	1.85315e-05	2.7e-08	Y		B1	137.5	138.5
20170918@626.asc	02_SFE2_9840_2_B3_053	25.0156	0.391574		16.682	0.247	2.58479	1.49395	1.73017	2017-09-22	00:49:00	-2086	-21	-25	29	0.000295629	0.000133998	2.7e-08	Y		B1	136	138.3
20170918@627.asc	02_SFE2_9840_2_B3_054	24.6779	0.391574		16.347	0.335	2.545	1.49248	1.70521	2017-09-22	00:53:00	-2107	0	-24	28	0.000566984	0.000405353	2.7e-08	Y		B1
20170918@628.asc	02_SFE2_9840_2_B3_055	24.5307	0.391574		16.201	0.258	2.62948	1.48706	1.76824	2017-09-22	00:57:00	-2059	-13	-25	30	0.000162616	9.84675e-07	2.7e-08	Y		B1
20170918@629.asc	UWQ1 G1				3.887	0.297	2.57433	1.49511	1.72183	2017-09-22	01:01:00	1048	655	-38	39	0.000169533		2.7e-08	Y
20170918@630.asc	UWQ1 G1				3.996	0.294	2.57845	1.49091	1.72944	2017-09-22	01:04:00	1068	655	-38	39	0.000165253		2.7e-08	Y
20170918@631.asc	UWQ1 G1 (Cs res 136->137)				3.958	0.346	2.69667	1.55301	1.73641	2017-09-22	01:10:00	1088	655	-39	39	0.000163954		2.7e-08	Y
20170918@632.asc	UWQ1 G1				3.871	0.259	2.72709	1.57519	1.73127	2017-09-22	01:13:00	1108	655	-39	39	0.000147892		2.7e-08	Y
	average and 2SD	12.33		-8.29967	3.928	0.118062										0.000161658
	bracket average and 2SD	12.33		-8.13025	4.0995	0.391574										0.000161631
20170918@633.asc	02_SFE2_9840_2_B3_056	24.26	0.150173		15.806	0.308	2.71811	1.57393	1.72695	2017-09-22	01:18:00	-2109	19	-26	28	0.000398749	0.000238018	2.7e-08	Y		B1	134.5	136.5
20170918@634.asc	02_SFE2_9840_2_B3_057	24.2106	0.150173		15.757	0.275	2.71692	1.57369	1.72647	2017-09-22	01:22:00	-2121	37	-26	28	0.000489439	0.000328707	2.7e-08	Y		B1
20170918@635.asc	02_SFE2_9840_2_B3_058	24.4364	0.150173		15.981	0.248	2.6718	1.57414	1.69731	2017-09-22	01:26:00	-2105	54	-26	29	0.000164603	3.8709e-06	2.7e-08	Y		B1
20170918@636.asc	02_SFE2_9840_2_B3_059	23.9555	0.150173		15.504	0.313	2.67182	1.574	1.69747	2017-09-22	01:29:00	-2101	63	-26	29	0.000224153	6.34217e-05	2.7e-08	Y		B1	138.8	142.8
20170918@637.asc	02_SFE2_9840_2_B3_060	24.0291	0.150173		15.577	0.283	2.68059	1.56938	1.70806	2017-09-22	01:33:00	-2113	82	-26	28	0.000170236	9.5039e-06	2.7e-08	Y		B1	140.9	143.5
20170918@638.asc	02_SFE2_9840_2_B3_061	23.4442	0.150173		14.997	0.211	2.71284	1.57077	1.72707	2017-09-22	01:36:00	-2120	95	-26	28	0.000213029	5.22972e-05	2.7e-08	Y		B1	141	141
20170918@639.asc	02_SFE2_9840_2_B3_062	22.3089	0.150173		13.871	0.229	2.69874	1.5695	1.71949	2017-09-22	01:40:00	-2127	116	-27	27	0.000177464	1.67319e-05	2.7e-08	Y		B1	140.8	143.8
20170918@640.asc	02_SFE2_9840_2_B3_063	24.2489	0.150173		15.795	0.281	2.63441	1.56851	1.67956	2017-09-22	01:43:00	-2131	101	-27	27	0.000170346	9.6146e-06	2.7e-08	Y		B1	140.8	140.8
20170918@641.asc	02_SFE2_9840_2_B3_064	24.1843	0.150173		15.731	0.273	2.66749	1.56632	1.70303	2017-09-22	01:47:00	-2130	128	-27	27	0.000238732	7.80004e-05	2.7e-08	Y		B1
20170918@642.asc	02_SFE2_9840_2_B3_065	24.3366	0.150173		15.882	0.258	2.67361	1.56266	1.71094	2017-09-22	01:50:00	-2129	143	-27	27	0.000169809	9.0777e-06	2.7e-08	Y		B1	138.9	142.2
20170918@643.asc	02_SFE2_9840_2_B3_066	24.2267	0.150173		15.773	0.266	2.70532	1.55946	1.73478	2017-09-22	01:54:00	-2128	152	-27	27	0.000161246	5.143e-07	2.7e-08	Y		B1	140.5	142.2
20170918@644.asc	02_SFE2_9840_2_B3_067	23.7346	0.150173		15.285	0.298	2.65556	1.55799	1.70448	2017-09-22	01:57:00	-2120	190	-28	27	0.000885051	0.000724319	2.7e-08	Y		B1	143.2	143.2
20170918@645.asc	02_SFE2_9840_2_B3_068	22.0901	0.150173		13.654	0.329	2.81723	1.56203	1.80358	2017-09-22	02:00:00	-2117	213	-27	28	0.00015422	-6.5113e-06	2.7e-08	Y		B1
20170918@646.asc	02_SFE2_9840_2_B3_069	23.7316	0.150173		15.282	0.319	2.66967	1.55545	1.71633	2017-09-22	02:04:00	-2134	207	-27	27	0.000311731	0.000150999	2.7e-08	Y		B1	136.8	137.2
20170918@647.asc	02_SFE2_9840_2_B3_070	24.258	0.150173		15.804	0.317	2.58812	1.55583	1.66351	2017-09-22	02:08:00	-2146	172	-26	26	0.000168093	7.3608e-06	2.7e-08	Y		B1
20170918@648.asc	02_SFE2_9840_2_B3_071	18.3058	0.150173		9.901	2.753	2.38111	1.55069	1.53552	2017-09-22	02:12:00	-2130	237	-27	28	0.00384598	0.00368525	2.7e-08	N	aberrant OH behavior	B1	135.5	135.5
20170918@649.asc	02_SFE2_9840_2_B3_072	23.536	0.150173		15.088	0.219	2.5123	1.55166	1.6191	2017-09-22	02:15:00	-2108	256	-28	27	0.000474585	0.000313854	2.7e-08	N	aberrant OH behavior
20170918@650.asc	02_SFE2_9840_2_B3_073	23.7407	0.150173		15.291	0.217	2.71603	1.55132	1.75079	2017-09-22	02:19:00	-2089	232	-27	27	0.000149846	-1.08861e-05	2.7e-08	Y		B2
20170918@651.asc	02_SFE2_9840_2_B3_074	24.0039	0.150173		15.552	0.188	2.74712	1.55229	1.76972	2017-09-22	02:22:00	-2072	232	-27	27	0.000141729	-1.90029e-05	2.7e-08	Y		B2
20170918@652.asc	02_SFE2_9840_2_B3_075	26.0255	0.150173		17.557	0.291	2.48594	1.55653	1.5971	2017-09-22	02:26:00	-2175	64	-25	25	0.000138688	-2.20434e-05	2.7e-08	Y		B2
20170918@653.asc	02_SFE2_9840_2_B3_076	25.4185	0.150173		16.955	0.307	2.54003	1.55265	1.63593	2017-09-22	02:29:00	-2159	64	-26	26	0.000144463	-1.62688e-05	2.7e-08	Y		B2
20170918@654.asc	02_SFE2_9840_2_B3_077	24.5211	0.150173		16.065	0.182	2.72383	1.55231	1.7547	2017-09-22	02:33:00	-2036	161	-27	27	0.000135659	-2.50729e-05	2.7e-08	Y		B2
20170918@655.asc	02_SFE2_9840_2_B3_078	23.901	0.150173		15.45	0.207	2.55221	1.55197	1.64449	2017-09-22	02:37:00	-1904	254	-28	27	0.00015693	-3.8014e-06	2.7e-08	Y		A
20170918@656.asc	UWQ1 G1				3.995	0.279	2.67241	1.55882	1.71439	2017-09-22	02:42:00	1096	676	-39	40	0.0001673		2.7e-08	Y
20170918@657.asc	UWQ1 G1				4.114	0.195	2.69726	1.55811	1.73111	2017-09-22	02:45:00	1116	676	-40	40	0.000153365		2.6e-08	Y
20170918@658.asc	UWQ1 G1				3.979	0.243	2.68718	1.55768	1.72512	2017-09-22	02:48:00	1136	676	-40	40	0.000170996		2.7e-08	Y
20170918@659.asc	UWQ1 G1				3.996	0.211	2.67126	1.55754	1.71505	2017-09-22	02:51:00	1156	676	-40	39	0.000147561		2.7e-08	Y
	average and 2SD	12.33		-8.2078	4.021	0.124975										0.000159805
	bracket average and 2SD	12.33		-8.25373	3.9745	0.150173										0.000160732
20170918@660.asc	02_SFE2_9840_2_B3_079	23.7511	0.274388		15.291	0.304	2.59059	1.54834	1.67314	2017-09-22	02:56:00	-1906	261	-30	27	0.000209186	4.89548e-05	2.7e-08	Y		A
20170918@661.asc	02_SFE2_9840_2_B3_080	24.4076	0.274388		15.942	0.209	2.52486	1.54998	1.62896	2017-09-22	02:59:00	-1877	232	-29	27	0.00016395	3.71924e-06	2.6e-08	Y		A
20170918@662.asc	05_SFOT1_10106_85_B1_001	22.9687	0.274388		14.515	0.274	2.65118	1.55439	1.7056	2017-09-22	03:06:00	2273	-766	-39	30	0.000201258	4.10267e-05	2.6e-08	Y		B1
20170918@663.asc	05_SFOT1_10106_85_B1_002	23.5787	0.274388		15.12	0.277	2.67995	1.55285	1.72583	2017-09-22	03:09:00	2309	-762	-39	30	0.000161372	1.14134e-06	2.6e-08	Y		B2
20170918@664.asc	05_SFOT1_10106_85_B1_003	23.6624	0.274388		15.203	0.229	2.67399	1.55539	1.71917	2017-09-22	03:13:00	2321	-760	-40	30	0.000182202	2.1971e-05	2.6e-08	Y		B2
20170918@665.asc	05_SFOT1_10106_85_B1_004	23.5364	0.274388		15.078	0.325	2.67756	1.55382	1.72321	2017-09-22	03:16:00	2333	-758	-40	30	0.000213102	5.28712e-05	2.6e-08	Y		B2
20170918@666.asc	05_SFOT1_10106_85_B1_005	23.8177	0.274388		15.357	0.19	2.66639	1.5561	1.71351	2017-09-22	03:19:00	2345	-756	-40	31	0.00015082	-9.41096e-06	2.6e-08	Y		B2
20170918@667.asc	05_SFOT1_10106_85_B1_006	24.0425	0.274388		15.58	0.221	2.68113	1.55332	1.72607	2017-09-22	03:22:00	2357	-754	-40	30	0.000146149	-1.40823e-05	2.6e-08	Y		B2
20170918@668.asc	05_SFOT1_10106_85_B1_007	24.1373	0.274388		15.674	0.232	2.66184	1.55462	1.71222	2017-09-22	03:26:00	2369	-752	-40	31	0.000143317	-1.69142e-05	2.6e-08	Y		B2
20170918@669.asc	05_SFOT1_10106_85_B1_008	24.0889	0.274388		15.626	0.227	2.6742	1.55079	1.72441	2017-09-22	03:29:00	2381	-750	-40	30	0.000144947	-1.52842e-05	2.6e-08	Y		B2
20170918@670.asc	05_SFOT1_10106_85_B1_009	24.216	0.274388		15.752	0.223	2.65258	1.5513	1.7099	2017-09-22	03:33:00	2393	-748	-40	30	0.000163843	3.61184e-06	2.6e-08	Y		B2
20170918@671.asc	05_SFOT1_10106_85_B1_010	21.8313	0.274388		13.387	0.314	2.89185	1.54798	1.86814	2017-09-22	03:36:00	2405	-746	-40	31	0.000429549	0.000269318	2.5e-08	N	aberrant OH behavior	B2
20170918@672.asc	05_SFOT1_10106_85_B1_011	24.2331	0.274388		15.769	0.228	2.71048	1.54886	1.74998	2017-09-22	03:39:00	2401	-734	-40	31	0.000346247	0.000186016	2.6e-08	N	aberrant OH behavior	B2
20170918@673.asc	05_SFOT1_10106_85_B1_012	22.6803	0.274388		14.229	0.237	2.62837	1.5425	1.70397	2017-09-22	03:44:00	2267	-720	-38	31	0.0001741	1.38692e-05	2.6e-08	Y		B1	135	135
20170918@674.asc	05_SFOT1_10106_85_B1_013	24.826	0.274388		16.357	0.249	2.63055	1.53846	1.70986	2017-09-22	03:48:00	2103	-755	-36	30	0.000158024	-2.20736e-06	2.6e-08	Y		B2
20170918@675.asc	05_SFOT1_10106_85_B1_014	24.828	0.274388		16.359	0.266	2.63258	1.53453	1.71556	2017-09-22	03:51:00	2083	-753	-36	30	0.000199189	3.89581e-05	2.6e-08	Y		B2
20170918@676.asc	05_SFOT1_10106_85_B1_015	23.2913	0.274388		14.835	0.193	2.63382	1.52779	1.72395	2017-09-22	03:56:00	1943	-966	-34	28	0.000133128	-2.71026e-05	2.6e-08	Y		B2
20170918@677.asc	05_SFOT1_10106_85_B1_016	23.3478	0.274388		14.891	0.236	2.60841	1.52665	1.70859	2017-09-22	04:00:00	1934	-989	-34	27	0.000282006	0.000121775	2.6e-08	Y		B1
20170918@678.asc	05_SFOT1_10106_85_B1_017	23.6543	0.274388		15.195	0.278	2.63431	1.52828	1.72371	2017-09-22	04:04:00	2025	-867	-35	29	0.000151512	-8.71886e-06	2.6e-08	Y		B2
20170918@679.asc	05_SFOT1_10106_85_B1_018	23.9931	0.274388		15.531	0.239	2.62551	1.53204	1.71374	2017-09-22	04:07:00	2041	-799	-36	29	0.000174859	1.46285e-05	2.6e-08	Y		B2
20170918@680.asc	UWQ1 G1				4.146	0.269	2.5935	1.53058	1.69446	2017-09-22	04:11:00	1090	692	-36	40	0.000166986		2.6e-08	Y
20170918@681.asc	UWQ1 G1				3.812	0.284	2.63972	1.52866	1.72682	2017-09-22	04:16:00	1110	692	-37	39	0.000166541		2.6e-08	Y
20170918@682.asc	UWQ1 G1				3.931	0.308	2.63421	1.52874	1.72313	2017-09-22	04:19:00	1130	692	-37	40	0.000158404		2.6e-08	Y
20170918@683.asc	UWQ1 G1				3.741	0.181	2.63582	1.528	1.72502	2017-09-22	04:22:00	1150	692	-37	40	0.000150694		2.5e-08	Y
	average and 2SD	12.33		-8.31992	3.9075	0.354546										0.000160656
	bracket average and 2SD	12.33		-8.26386	3.96425	0.274388										0.000160231
20170918@684.asc	05_SFOT1_10106_85_B1_019	22.8595	0.323066		14.423	0.285	2.62655	1.51507	1.73361	2017-09-22	04:30:00	1858	-853	-32	29	0.000200993	4.2078e-05	2.6e-08	Y		B1
20170918@685.asc	05_SFOT1_10106_85_B1_020	23.5885	0.323066		15.146	0.278	2.60039	1.51918	1.71171	2017-09-22	04:33:00	1856	-792	-32	29	0.000165343	6.42764e-06	2.6e-08	Y		B1
20170918@686.asc	05_SFOT1_10106_85_B1_021	23.0309	0.323066		14.593	0.289	2.59762	1.51724	1.71208	2017-09-22	04:37:00	1849	-711	-32	30	0.000187832	2.89169e-05	2.5e-08	Y		B1
20170918@687.asc	05_SFOT1_10106_85_B1_022	23.4877	0.323066		15.046	0.285	2.60736	1.51421	1.72192	2017-09-22	04:40:00	1936	-785	-33	30	0.000233634	7.4719e-05	2.6e-08	Y		B1
20170918@688.asc	05_SFOT1_10106_85_B1_023	22.7526	0.323066		14.317	0.258	2.60228	1.51265	1.72034	2017-09-22	04:44:00	1884	-938	-33	29	0.000179121	2.02059e-05	2.6e-08	Y		B1
20170918@689.asc	05_SFOT1_10106_85_B1_024	23.1237	0.323066		14.685	0.25	2.606	1.51125	1.72441	2017-09-22	04:48:00	1917	-1086	-33	27	0.000189904	3.09888e-05	2.5e-08	Y		B1
20170918@690.asc	05_SFOT1_10106_85_B1_025	23.2719	0.323066		14.832	0.264	2.61282	1.50376	1.73753	2017-09-22	04:52:00	1848	-446	-31	32	0.000173907	1.49921e-05	2.6e-08	Y		B1
20170918@691.asc	05_SFOT1_10106_85_B1_026	22.6749	0.323066		14.24	0.235	2.59908	1.51608	1.71434	2017-09-22	04:57:00	2256	-828	-38	30	0.000173369	1.44542e-05	2.6e-08	Y		B1
20170918@692.asc	05_SFOT1_10106_85_B1_027	22.918	0.323066		14.481	0.23	2.57251	1.50981	1.70386	2017-09-22	05:01:00	2250	-848	-38	30	0.000656575	0.00049766	2.6e-08	Y		B1	152	153
20170918@693.asc	05_SFOT1_10106_85_B1_028	23.3616	0.323066		14.921	0.216	2.59786	1.50982	1.72064	2017-09-22	05:05:00	2197	-796	-37	30	0.00029677	0.000137855	2.6e-08	Y		B2	151	151.8
20170918@694.asc	05_SFOT1_10106_85_B1_029	23.2426	0.323066		14.803	0.277	2.61388	1.50855	1.73271	2017-09-22	05:09:00	2197	-780	-37	30	0.000166977	8.06194e-06	2.6e-08	Y		B2
20170918@695.asc	05_SFOT1_10106_85_B1_030	23.7317	0.323066		15.288	0.232	2.56443	1.51158	1.69652	2017-09-22	05:12:00	2177	-820	-37	30	0.000170212	1.12969e-05	2.6e-08	Y		B2
20170918@696.asc	05_SFOT1_10106_85_B1_031	23.6439	0.323066		15.201	0.266	2.56831	1.50939	1.70155	2017-09-22	05:16:00	2197	-820	-38	30	0.000151631	-7.28406e-06	2.6e-08	Y		B2
20170918@697.asc	05_SFOT1_10106_85_B1_032	24.1027	0.323066		15.656	0.273	2.58922	1.51149	1.71302	2017-09-22	05:19:00	2157	-780	-36	30	0.000175363	1.6448e-05	2.6e-08	Y		B2
20170918@698.asc	05_SFOT1_10106_85_B1_033	24.381	0.323066		15.932	0.263	2.58195	1.51026	1.70961	2017-09-22	05:22:00	2137	-760	-36	30	0.000175334	1.64188e-05	2.6e-08	Y		B2
20170918@699.asc	05_SFOT1_10106_85_B1_034	24.5373	0.323066		16.087	0.223	2.59877	1.50593	1.72568	2017-09-22	05:26:00	2111	-740	-36	31	0.000181805	2.28896e-05	2.6e-08	Y		B2
20170918@700.asc	05_SFOT1_10106_85_B1_035	24.9618	0.323066		16.508	0.336	2.64103	1.50506	1.75477	2017-09-22	05:29:00	2049	-410	-34	33	0.000222019	6.31041e-05	2.5e-08	Y		B2
20170918@701.asc	05_SFOT1_10106_85_B1_036	22.554	0.323066		14.12	0.347	2.56963	1.50387	1.70868	2017-09-22	05:34:00	2265	-917	-38	29	0.00339382	0.00323491	2.6e-08	Y		B1
20170918@702.asc	05_SFOT1_10106_85_B1_037	22.6699	0.323066		14.235	0.229	2.53969	1.50425	1.68834	2017-09-22	05:37:00	2265	-929	-38	29	0.000185286	2.63707e-05	2.6e-08	Y		B1
20170918@703.asc	05_SFOT1_10106_85_B1_038	22.6276	0.323066		14.193	0.225	2.57577	1.50576	1.71061	2017-09-22	05:42:00	2277	-813	-38	30	0.000183412	2.44969e-05	2.6e-08	Y		B1
20170918@704.asc	UWQ1 G1				4.202	0.233	2.5698	1.49962	1.71363	2017-09-22	05:47:00	1094	713	-35	39	0.000163777		2.6e-08	Y
20170918@705.asc	UWQ1 G1				4.002	0.272	2.59085	1.49919	1.72816	2017-09-22	05:50:00	1114	713	-35	40	0.000152002		2.6e-08	Y
20170918@706.asc	UWQ1 G1 (Cs res 137->138)				3.914	0.3	2.70199	1.57443	1.71617	2017-09-22	05:56:00	1134	713	-35	41	0.000152533		2.6e-08	Y
20170918@707.asc	UWQ1 G1				5.207	0.28	2.71253	1.58807	1.70807	2017-09-22	05:59:00	1154	713	-35	41	0.000373965		2.6e-08	N	aberrant OH, mineral inclusion
20170918@708.asc	UWQ1 G1				4.095	0.281	2.72069	1.58876	1.71246	2017-09-22	06:03:00	1094	733	-35	40	0.000160383		2.6e-08	Y
	average and 2SD	12.33		-8.17594	4.05325	0.247351										0.000157174
	bracket average and 2SD	12.33		-8.24793	3.98037	0.323066										0.000158915
20170918@709.asc	05_SFOT1_10106_85_B1_039	22.8878	0.289669		14.452	0.249	2.70674	1.59413	1.69794	2017-09-22	06:09:00	2261	-669	-37	30	0.000176511	2.15644e-05	2.5e-08	Y		B1	136	136
20170918@710.asc	05_SFOT1_10106_85_B1_040	22.9594	0.289669		14.523	0.302	2.71644	1.59435	1.70379	2017-09-22	06:12:00	2229	-628	-36	30	0.000166574	1.16264e-05	2.5e-08	Y		B1	135	138.5
20170918@711.asc	05_SFOT1_10106_85_B1_041	22.9624	0.289669		14.526	0.245	2.70451	1.59561	1.69497	2017-09-22	06:16:00	2204	-555	-36	32	0.000186779	3.18322e-05	2.6e-08	Y		B1	142.5	145
20170918@712.asc	05_SFOT1_10106_85_B1_042	22.794	0.289669		14.359	0.388	2.68476	1.59411	1.68418	2017-09-22	06:20:00	2252	-491	-36	32	0.000901213	0.000746266	2.6e-08	Y		B1	143.5	145.5
20170918@713.asc	05_SFOT1_10106_85_B1_043	22.9725	0.289669		14.536	0.267	2.75083	1.59467	1.72501	2017-09-22	06:23:00	2220	-460	-36	33	0.000212699	5.77523e-05	2.6e-08	Y		B1	142	144
20170918@714.asc	05_SFOT1_10106_85_B1_044	23.0794	0.289669		14.642	0.236	2.7271	1.58802	1.7173	2017-09-22	06:27:00	2198	-410	-35	33	0.000181878	2.69314e-05	2.6e-08	Y		B1
20170918@715.asc	05_SFOT1_10106_85_B1_045	23.7832	0.289669		15.34	0.227	2.70727	1.58907	1.70368	2017-09-22	06:33:00	2213	-368	-36	34	0.000148342	-6.60544e-06	2.6e-08	Y		B1
20170918@716.asc	05_SFOT1_10106_85_B1_046	22.6932	0.289669		14.259	0.336	2.7381	1.58385	1.72876	2017-09-22	06:37:00	2216	-383	-36	34	0.000302653	0.000147706	2.6e-08	Y		B1
20170918@717.asc	05_SFOT1_10106_85_B1_047	22.8535	0.289669		14.418	0.243	2.77992	1.58277	1.75637	2017-09-22	06:40:00	2236	-383	-36	34	0.000184829	2.98814e-05	2.6e-08	Y		B1	141.5	145
20170918@718.asc	05_SFOT1_10106_85_B1_048	22.8455	0.289669		14.41	0.29	2.71242	1.58179	1.71478	2017-09-22	06:44:00	2183	-319	-35	35	0.000368321	0.000213374	2.6e-08	Y		B1
20170918@719.asc	05_SFOT1_10106_85_B1_049	23.5947	0.289669		15.153	0.426	2.57287	1.58156	1.6268	2017-09-22	06:48:00	2160	-240	-34	35	0.0099548	0.00979986	2.5e-08	N	aberrant OH behavior	B1
20170918@720.asc	05_SFOT1_10106_85_B1_050	22.9019	0.289669		14.466	0.249	2.71018	1.57981	1.71551	2017-09-22	06:52:00	2174	-205	-34	36	0.00017111	1.61633e-05	2.6e-08	Y		B1	142	146.5
20170918@721.asc	05_SFOT1_10106_85_B1_051	23.0824	0.289669		14.645	0.269	2.67475	1.5755	1.69771	2017-09-22	06:55:00	2177	-226	-35	36	0.000194411	3.94634e-05	2.6e-08	Y		B1	143	143.5
20170918@722.asc	05_SFOT1_10106_85_B1_052	23.4414	0.289669		15.001	0.214	2.69869	1.57643	1.7119	2017-09-22	06:58:00	2198	-254	-35	35	0.000194674	3.9727e-05	2.6e-08	Y		B1
20170918@723.asc	05_SFOT1_10106_85_B1_053	23.2962	0.289669		14.857	0.274	2.6411	1.5757	1.67615	2017-09-22	07:02:00	2207	-271	-35	35	0.000212672	5.77247e-05	2.6e-08	Y		B1
20170918@724.asc	UWQ1 G1				3.859	0.285	2.70152	1.56191	1.72962	2017-09-22	07:06:00	1118	734	-36	40	0.000159034		2.6e-08	Y
20170918@725.asc	UWQ1 G1				4.094	0.2	2.67114	1.5638	1.7081	2017-09-22	07:10:00	1138	734	-36	41	0.000150854		2.6e-08	Y
20170918@726.asc	UWQ1 G1				3.925	0.225	2.67338	1.56257	1.71088	2017-09-22	07:13:00	1158	734	-36	41	0.000145665		2.6e-08	Y
20170918@727.asc	UWQ1 G1				3.759	0.248	2.68766	1.56141	1.72131	2017-09-22	07:16:00	1158	754	-36	42	0.000155329		2.6e-08	Y
	average and 2SD	12.33		-8.31819	3.90925	0.281616										0.000152721
	bracket average and 2SD	12.33		-8.24706	3.98125	0.289669										0.000154947
20170918@728.asc	05_SFOT1_10106_85_B1_054	23.089	0.245115		14.628	0.206	2.6894	1.55188	1.73299	2017-09-22	07:22:00	1891	-449	-34	32	0.00018123	2.29593e-05	2.6e-08	Y		B1
20170918@729.asc	05_SFOT1_10106_85_B1_055	23.1414	0.245115		14.68	0.258	2.65801	1.54882	1.71615	2017-09-22	07:26:00	1802	-500	-32	32	0.000170904	1.26331e-05	2.6e-08	Y		B1
20170918@730.asc	05_SFOT1_10106_85_B1_055	23.8432	0.245115		15.376	0.283	2.60843	1.54508	1.68822	2017-09-22	07:29:00	1732	-534	-30	31	0.000161227	2.95563e-06	2.6e-08	Y		B2
20170918@731.asc	05_SFOT1_10106_85_B1_056	24.7648	0.245115		16.29	0.288	2.67757	1.5556	1.72124	2017-09-22	07:33:00	2366	-532	-40	33	0.000161843	3.57212e-06	2.6e-08	Y		B2
20170918@732.asc	05_SFOT1_10106_85_B1_057	12.934	0.245115		4.557	0.189	2.74487	1.5621	1.75717	2017-09-22	07:37:00	2480	-166	-40	38	0.000218829	6.05583e-05	2.6e-08	N	aberrant OH behavior	D
20170918@733.asc	05_SFOT1_10106_85_B1_058	22.5394	0.245115		14.083	0.266	2.7004	1.55847	1.73273	2017-09-22	07:41:00	2480	-188	-42	37	0.00019741	3.9139e-05	2.6e-08	Y		A
20170918@734.asc	05_SFOT1_10106_85_B1_059	22.9952	0.245115		14.535	0.221	2.68387	1.55627	1.72455	2017-09-22	07:44:00	2479	-231	-42	38	0.000167726	9.45443e-06	2.6e-08	Y		A
20170918@735.asc	05_SFOT1_10106_85_B1_060	22.1764	0.245115		13.723	0.188	2.70755	1.5586	1.73716	2017-09-22	07:48:00	2527	-134	-40	38	0.00140069	0.00124242	2.6e-08	N	aberrant OH behavior	A
20170918@736.asc	05_SFOT1_10106_85_B1_060	22.2924	0.245115		13.838	0.218	2.72001	1.55675	1.74723	2017-09-22	07:51:00	2529	-118	-40	39	0.000201795	4.35238e-05	2.6e-08	Y		A
20170918@737.asc	UWQ1 G1				3.934	0.246	2.64679	1.53748	1.72151	2017-09-22	07:55:00	1135	757	-37	41	0.000168714		2.6e-08	Y
20170918@738.asc	UWQ1 G1				3.941	0.248	2.64269	1.53416	1.72257	2017-09-22	07:59:00	1115	757	-36	41	0.000164796		2.6e-08	Y
20170918@739.asc	UWQ1 G1				4.015	0.315	2.62729	1.53075	1.71634	2017-09-22	08:02:00	1095	757	-35	40	0.000161699		2.6e-08	Y
20170918@740.asc	UWQ1 G1				4.137	0.295	2.63345	1.52766	1.72384	2017-09-22	08:05:00	1095	777	-36	40	0.000160077		2.6e-08	Y
	average and 2SD	12.33		-8.22187	4.00675	0.188498										0.000163822
	bracket average and 2SD	12.33		-8.27003	3.958	0.245115										0.000158271
